# Supplementary material for: Nitrogen enrichment leads to changing fatty acid composition of phytoplankton and negatively affects zooplankton in a natural lake community
Source: PubMed Central journal article supplement (PMC6856376; doi:10.1038/s41598-019-53250-x), 2019-11-14
Supplement: 41598_2019_53250_MOESM1_ESM.pdf [file 41598_2019_53250_MOESM1_ESM.pdf]

**Nitrogen enrichment leads to changing fatty acid composition of phytoplankton and negatively affects zooplankton in a natural lake community**

Gabriele Trommer, Patrick Lorenz, Ameli Lentz, Patrick Fink, Herwig Stibor

Supplementary Information

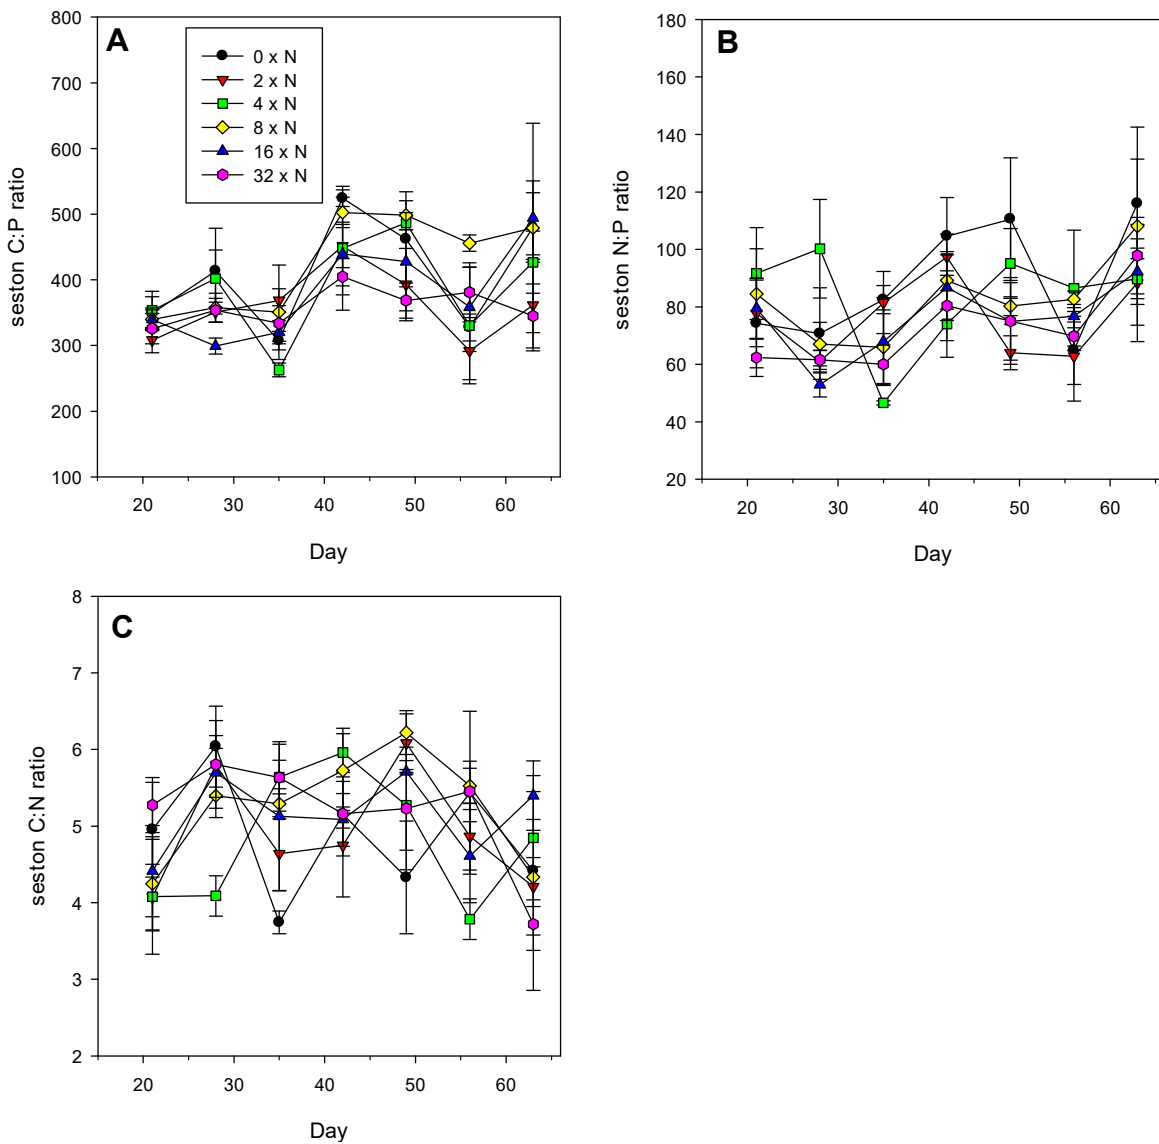

**Supplementary Figure S1.** Seston stoichiometry in all six N fertilisation treatments. (A) seston C:P ratios, (B) seston N:P ratios and (C) seston C:N ratios (mean  $\pm$  1 SE of  $n = 3$  replicates) over time.

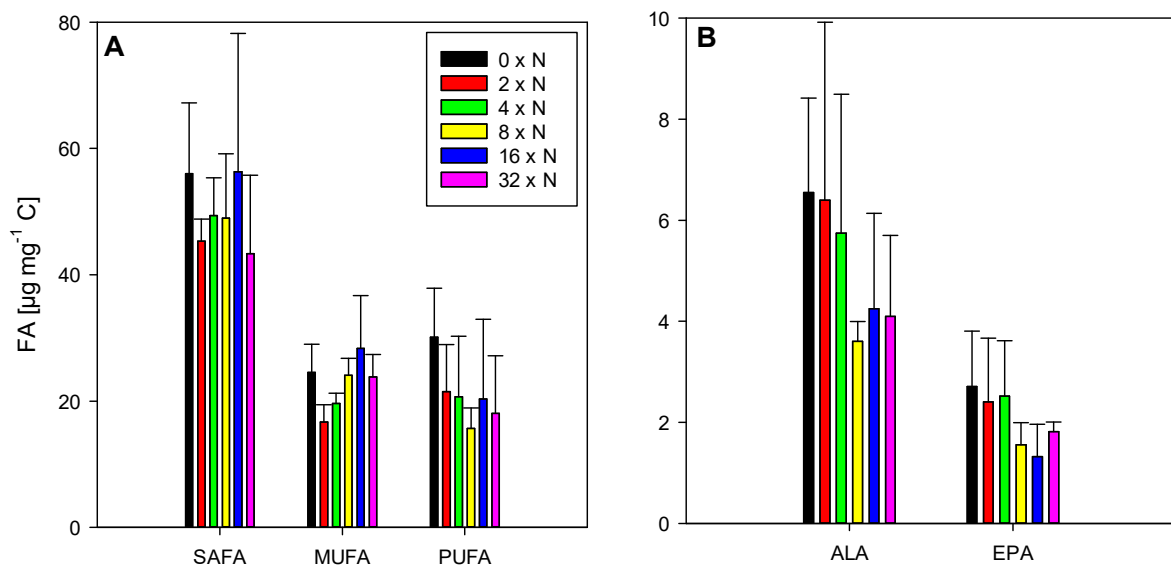

**Supplementary Figure S2.** Fatty acid composition in all six N fertilisation treatments. (A) Saturated fatty acids (SAFAs), mono unsaturated fatty acids (MUFAs), PUFAs and (B) ALA and EPA (mean  $\pm$  1 SE of  $n = 3$  replicates).

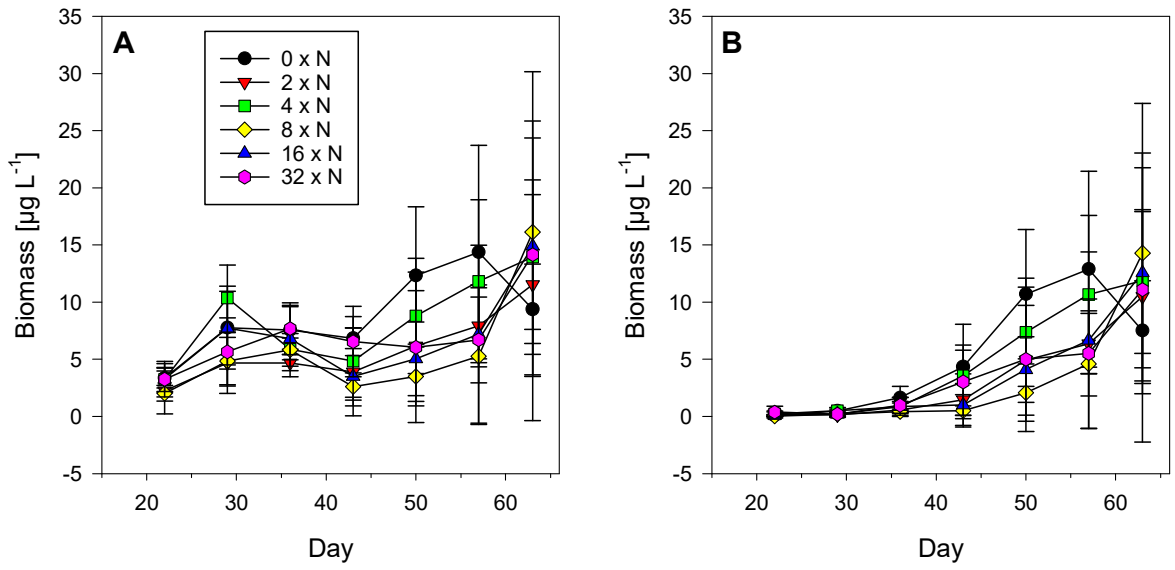

**Supplementary Figure S3.** Time course of zooplankton biomass in all six N fertilisation treatments. (A) Total zooplankton biomass and (B) *Daphnia sp.* biomass ( $\mu\text{g L}^{-1}$ , mean  $\pm$  1 SE of  $n = 3$  replicates) in all six N treatments over time.

Supplementary Table 1: Seston fatty acid composition (ng/mg C) of the mesocosms (day 49).

| Mesocosm No. | Date     | Treatment No. | Treatment N fertilization | Total FA | C10:0 | C11:0 | C12:0 | C13:0 | C14:0  | C14:1 ω9 | C15:0  | C15:1 ω9 | C16:0   | C16:1 ω9 | C17:0 | C17:1 ω9 | C18:0   | C18:1 ω9 t | C18:1 ω9 c | C18:1 ω7 | C18:2 ω6 t | C18:2 ω6 c | C18:3 ω6 | C18:3 ω3 | C18:4 ω3 |
|--------------|----------|---------------|---------------------------|----------|-------|-------|-------|-------|--------|----------|--------|----------|---------|----------|-------|----------|---------|------------|------------|----------|------------|------------|----------|----------|----------|
| 01           | 06.05.15 | 1             | 0                         | 115034,5 | 0,0   | 0,0   | 619,3 | 292,8 | 804,6  | 902,2    | 823,8  | 0,0      | 17424,7 | 3953,0   | 903,2 | 0,0      | 6180,2  | 0,0        | 15474,5    | 3535,3   | 0,0        | 15981,3    | 0,0      | 8669,0   | 691,5    |
| 02           | 06.05.15 | 1             | 0                         | 85617,6  | 0,0   | 0,0   | 567,4 | 270,0 | 585,3  | 579,7    | 696,4  | 0,0      | 12767,3 | 4160,9   | 592,7 | 0,0      | 5526,1  | 0,0        | 12129,3    | 2563,7   | 0,0        | 10937,0    | 317,7    | 5839,9   | 463,6    |
| 03           | 06.05.15 | 1             | 0                         | 131541,7 | 0,0   | 0,0   | 775,9 | 0,0   | 4248,3 | 707,3    | 256,1  | 0,0      | 23158,6 | 1111,8   | 327,6 | 0,0      | 7796,3  | 0,0        | 23428,6    | 2832,9   | 0,0        | 25933,2    | 840,8    | 5139,2   | 1294,2   |
| 04           | 06.05.15 | 2             | 2                         | 76758,8  | 0,0   | 0,0   | 389,6 | 0,0   | 422,2  | 546,8    | 548,7  | 0,0      | 12284,5 | 1815,5   | 347,2 | 0,0      | 4522,9  | 0,0        | 10438,2    | 1961,3   | 0,0        | 9736,8     | 386,6    | 3454,6   | 1042,3   |
| 05           | 06.05.15 | 2             | 2                         | 92520,2  | 0,0   | 0,0   | 386,8 | 0,0   | 1051,0 | 940,4    | 0,0    | 0,0      | 14235,7 | 1392,9   | 859,6 | 0,0      | 5292,1  | 0,0        | 12683,2    | 4093,5   | 0,0        | 11670,3    | 0,0      | 10305,5  | 541,2    |
| 06           | 06.05.15 | 2             | 2                         | 81308,5  | 0,0   | 0,0   | 0,0   | 209,4 | 9087,4 | 976,6    | 0,0    | 514,0    | 14360,8 | 1897,1   | 621,4 | 0,0      | 4103,8  | 0,0        | 7429,9     | 2983,8   | 0,0        | 6834,6     | 0,0      | 5424,8   | 694,5    |
| 07           | 06.05.15 | 3             | 4                         | 92157,1  | 0,0   | 0,0   | 0,0   | 272,1 | 704,0  | 853,3    | 0,0    | 513,3    | 14456,1 | 1515,5   | 739,8 | 0,0      | 5324,6  | 0,0        | 11510,0    | 3287,8   | 0,0        | 11135,7    | 421,6    | 6545,6   | 579,2    |
| 08           | 06.05.15 | 3             | 4                         | 102702,8 | 0,0   | 0,0   | 0,0   | 0,0   | 731,4  | 822,5    | 0,0    | 487,7    | 15231,9 | 1225,3   | 798,3 | 0,0      | 5891,2  | 0,0        | 13408,6    | 2901,0   | 0,0        | 13623,5    | 0,0      | 8003,1   | 676,8    |
| 09           | 06.05.15 | 3             | 4                         | 74465,4  | 0,0   | 0,0   | 0,0   | 0,0   | 7738,3 | 743,7    | 206,0  | 316,8    | 10169,7 | 12977,2  | 359,1 | 0,0      | 2421,7  | 0,0        | 4833,4     | 2136,7   | 0,0        | 4045,4     | 275,2    | 2687,0   | 668,6    |
| 10           | 06.05.15 | 4             | 8                         | 103222,8 | 0,0   | 0,0   | 742,0 | 424,3 | 2689,6 | 491,5    | 642,6  | 0,0      | 11487,6 | 3248,7   | 344,9 | 0,0      | 5937,5  | 0,0        | 13543,8    | 2080,5   | 0,0        | 11159,4    | 469,2    | 3155,3   | 1794,4   |
| 11           | 06.05.15 | 4             | 8                         | 88112,9  | 0,0   | 0,0   | 398,2 | 204,5 | 8558,2 | 1310,4   | 608,5  | 0,0      | 12622,4 | 15462,9  | 372,5 | 0,0      | 3179,6  | 0,0        | 6985,4     | 2752,7   | 0,0        | 5487,0     | 266,5    | 3797,9   | 660,0    |
| 12           | 06.05.15 | 4             | 8                         | 75109,0  | 0,0   | 0,0   | 356,4 | 0,0   | 7676,7 | 1144,8   | 615,4  | 0,0      | 11224,9 | 12498,3  | 336,0 | 0,0      | 3055,9  | 0,0        | 5843,0     | 2204,7   | 0,0        | 5082,5     | 247,0    | 3867,4   | 588,3    |
| 13           | 06.05.15 | 5             | 16                        | 87547,7  | 0,0   | 0,0   | 0,0   | 0,0   | 6004,7 | 1222,2   | 740,1  | 0,0      | 12419,0 | 10542,7  | 399,3 | 0,0      | 3587,2  | 0,0        | 8398,3     | 2971,2   | 0,0        | 7064,2     | 399,6    | 5637,2   | 669,1    |
| 14           | 06.05.15 | 5             | 16                        | 74080,8  | 0,0   | 0,0   | 0,0   | 0,0   | 8535,7 | 1334,8   | 206,2  | 0,0      | 11385,1 | 14219,8  | 291,5 | 169,0    | 3083,9  | 0,0        | 5672,9     | 2190,2   | 0,0        | 4415,2     | 245,2    | 2100,8   | 632,5    |
| 15           | 06.05.15 | 5             | 16                        | 153407,5 | 0,0   | 0,0   | 726,9 | 308,7 | 4579,9 | 1003,1   | 1273,3 | 0,0      | 24858,1 | 6699,5   | 360,9 | 0,0      | 10106,2 | 0,0        | 25745,7    | 3452,0   | 0,0        | 26124,3    | 659,8    | 5014,7   | 1310,2   |
| 16           | 06.05.15 | 6             | 32                        | 113606,1 | 0,0   | 0,0   | 557,8 | 0,0   | 550,8  | 643,5    | 985,7  | 0,0      | 18487,3 | 5627,7   | 382,9 | 0,0      | 7905,4  | 0,0        | 17878,1    | 3007,0   | 0,0        | 17951,8    | 684,7    | 5192,5   | 1136,1   |
| 17           | 06.05.15 | 6             | 32                        | 74871,6  | 0,0   | 165,2 | 449,9 | 194,3 | 626,9  | 1152,3   | 171,8  | 0,0      | 11864,8 | 11984,4  | 477,1 | 0,0      | 3094,0  | 0,0        | 7057,8     | 2840,9   | 0,0        | 5419,8     | 292,5    | 4840,8   | 726,9    |
| 18           | 06.05.15 | 6             | 32                        | 67359,8  | 0,0   | 130,8 | 0,0   | 138,1 | 7852,6 | 655,1    | 0,0    | 256,3    | 10354,7 | 12474,0  | 297,4 | 0,0      | 2364,1  | 0,0        | 4721,8     | 2131,3   | 0,0        | 3793,4     | 275,2    | 2250,4   | 979,8    |

| Mesocosm No. | Date     | Treatment No. | Treatment N fertilization | C19:0   | C20:0 | C20:1 ω9 | C20:1 ω7 | C20:2 ω6 | C20:3 ω6 | C20:4 ω6 | C21:0 | C20:3 ω3 | C20:5 ω3 | C22:0 | C22:1 ω9 | C22:2 ω6 | C23:0   | C22:6 ω3 | C24:0 | C24:1 ω9 |
|--------------|----------|---------------|---------------------------|---------|-------|----------|----------|----------|----------|----------|-------|----------|----------|-------|----------|----------|---------|----------|-------|----------|
| 01           | 06.05.15 | 1             | 0                         | 15533,4 | 0,0   | 0,0      | 0,0      | 567,1    | 0,0      | 1240,1   | 0,0   | 1036,3   | 3947,9   | 523,6 | 397,3    | 0,0      | 15533,4 | 0,0      | 0,0   | 0,0      |
| 02           | 06.05.15 | 1             | 0                         | 10686,4 | 0,0   | 0,0      | 891,2    | 430,2    | 0,0      | 615,7    | 961,3 | 321,2    | 1880,3   | 393,6 | 0,0      | 754,3    | 10686,4 | 0,0      | 0,0   | 0,0      |
| 03           | 06.05.15 | 1             | 0                         | 14076,5 | 0,0   | 0,0      | 498,1    | 0,0      | 0,0      | 880,1    | 0,0   | 316,9    | 2307,4   | 947,2 | 588,0    | 0,0      | 14076,5 | 0,0      | 0,0   | 0,0      |
| 04           | 06.05.15 | 2             | 2                         | 12474,8 | 0,0   | 0,0      | 421,5    | 0,0      | 0,0      | 487,8    | 0,0   | 198,9    | 1142,2   | 382,3 | 1129,2   | 150,3    | 12474,8 | 0,0      | 0,0   | 0,0      |
| 05           | 06.05.15 | 2             | 2                         | 10319,5 | 0,0   | 0,0      | 0,0      | 0,0      | 0,0      | 1462,0   | 0,0   | 2423,4   | 3667,0   | 341,9 | 534,8    | 0,0      | 10319,5 | 0,0      | 0,0   | 0,0      |
| 06           | 06.05.15 | 2             | 2                         | 10343,6 | 0,0   | 0,0      | 0,0      | 0,0      | 0,0      | 1272,3   | 0,0   | 1163,1   | 2401,3   | 277,2 | 369,4    | 0,0      | 10343,6 | 0,0      | 0,0   | 0,0      |
| 07           | 06.05.15 | 3             | 4                         | 14079,4 | 0,0   | 0,0      | 111,9    | 365,3    | 0,0      | 1014,1   | 0,0   | 797,0    | 2889,8   | 446,5 | 515,1    | 0,0      | 14079,4 | 0,0      | 0,0   | 0,0      |
| 08           | 06.05.15 | 3             | 4                         | 15939,6 | 0,0   | 0,0      | 0,0      | 522,3    | 0,0      | 1077,4   | 0,0   | 1077,8   | 3385,7   | 475,3 | 483,8    | 0,0      | 15939,6 | 0,0      | 0,0   | 0,0      |
| 09           | 06.05.15 | 3             | 4                         | 11014,0 | 0,0   | 0,0      | 106,0    | 0,0      | 0,0      | 742,9    | 0,0   | 254,7    | 1298,8   | 176,5 | 279,9    | 0,0      | 11014,0 | 0,0      | 0,0   | 0,0      |
| 10           | 06.05.15 | 4             | 8                         | 18827,8 | 0,0   | 0,0      | 4315,5   | 0,0      | 0,0      | 0,0      | 0,0   | 370,4    | 1070,1   | 341,8 | 0,0      | 1258,3   | 18827,8 | 0,0      | 0,0   | 0,0      |
| 11           | 06.05.15 | 4             | 8                         | 9870,4  | 379,4 | 0,0      | 479,6    | 0,0      | 0,0      | 1457,5   | 0,0   | 812,8    | 1919,0   | 200,7 | 0,0      | 456,4    | 9870,4  | 0,0      | 0,0   | 0,0      |
| 12           | 06.05.15 | 4             | 8                         | 8449,1  | 0,0   | 0,0      | 0,0      | 0,0      | 0,0      | 1010,7   | 0,0   | 564,7    | 1675,3   | 218,8 | 0,0      | 0,0      | 8449,1  | 0,0      | 0,0   | 0,0      |
| 13           | 06.05.15 | 5             | 16                        | 11265,0 | 565,1 | 145,8    | 0,0      | 290,5    | 0,0      | 880,5    | 0,0   | 734,2    | 2061,6   | 285,2 | 0,0      | 0,0      | 11265,0 | 0,0      | 0,0   | 0,0      |
| 14           | 06.05.15 | 5             | 16                        | 8615,4  | 0,0   | 0,0      | 125,0    | 0,0      | 0,0      | 601,3    | 0,0   | 220,4    | 988,8    | 236,3 | 195,6    | 0,0      | 8615,4  | 0,0      | 0,0   | 0,0      |
| 15           | 06.05.15 | 5             | 16                        | 19126,3 | 0,0   | 0,0      | 478,6    | 0,0      | 0,0      | 0,0      | 0,0   | 0,0      | 922,0    | 934,6 | 596,5    | 0,0      | 19126,3 | 0,0      | 0,0   | 0,0      |
| 16           | 06.05.15 | 6             | 32                        | 14044,0 | 0,0   | 283,8    | 230,8    | 345,3    | 0,0      | 714,3    | 0,0   | 368,5    | 1866,7   | 717,4 | 0,0      | 0,0      | 14044,0 | 0,0      | 0,0   | 0,0      |
| 17           | 06.05.15 | 6             | 32                        | 9543,8  | 0,0   | 0,0      | 0,0      | 311,4    | 0,0      | 949,1    | 0,0   | 747,3    | 1979,7   | 254,5 | 182,5    | 0,0      | 9543,8  | 0,0      | 0,0   | 0,0      |
| 18           | 06.05.15 | 6             | 32                        | 7343,4  | 0,0   | 0,0      | 103,5    | 0,0      | 0,0      | 809,1    | 0,0   | 224,6    | 1607,7   | 218,6 | 237,1    | 93,2     | 7343,4  | 704,5    | 0,0   | 0,0      |
